# Supplementary material
Source: Springer Nature journal article supplement (https://www.springermedizin.de/resource/supplementary/12958_2009_499_MOESM1_ESM.pdf/9568158)

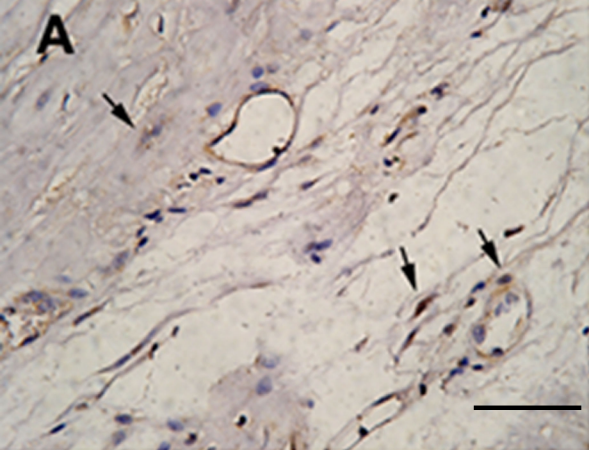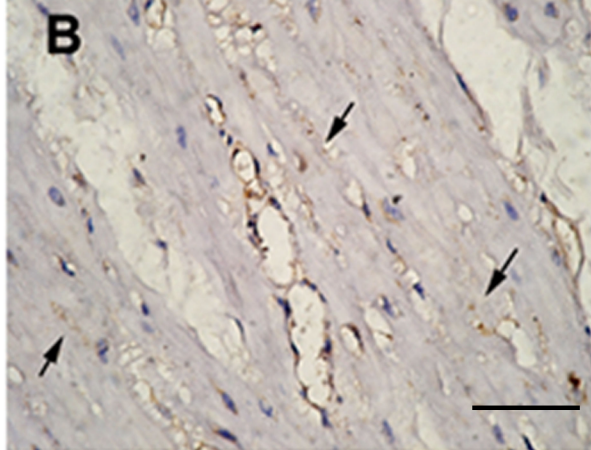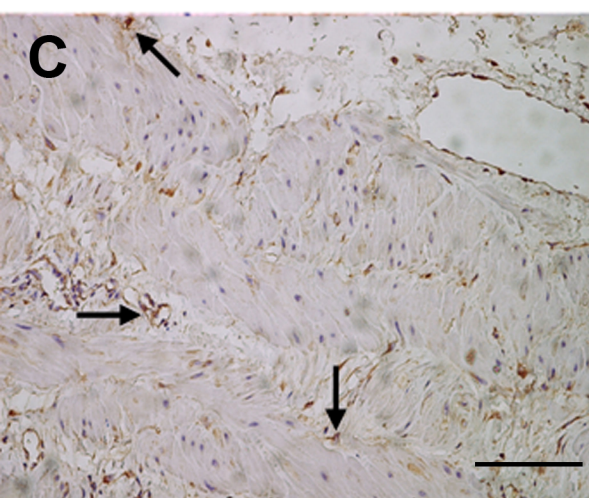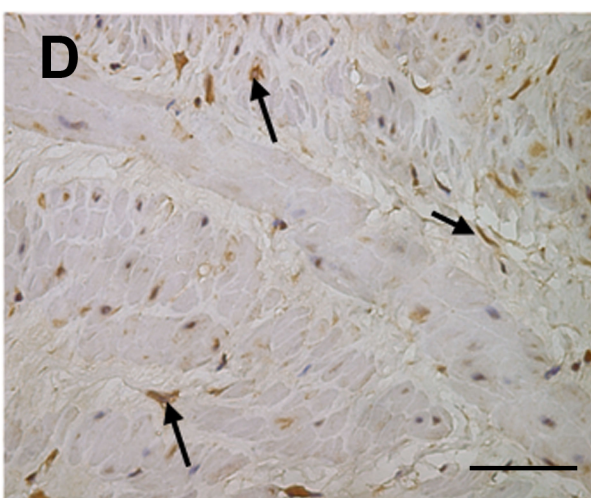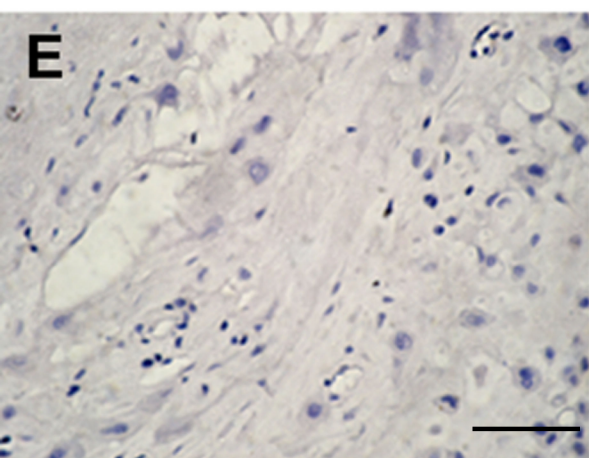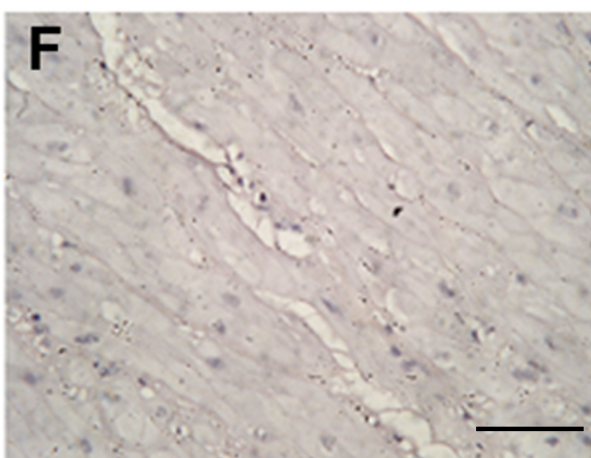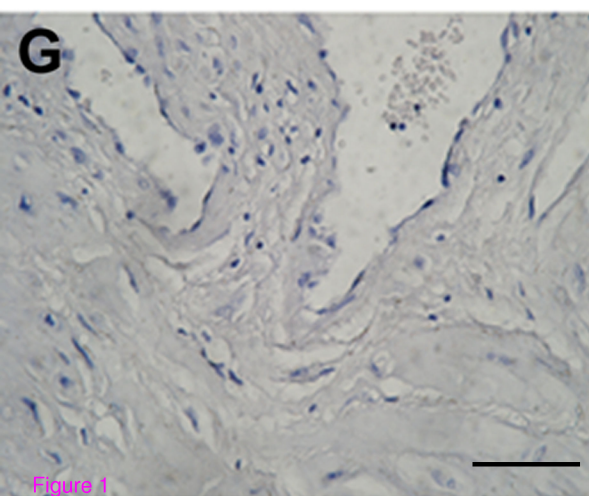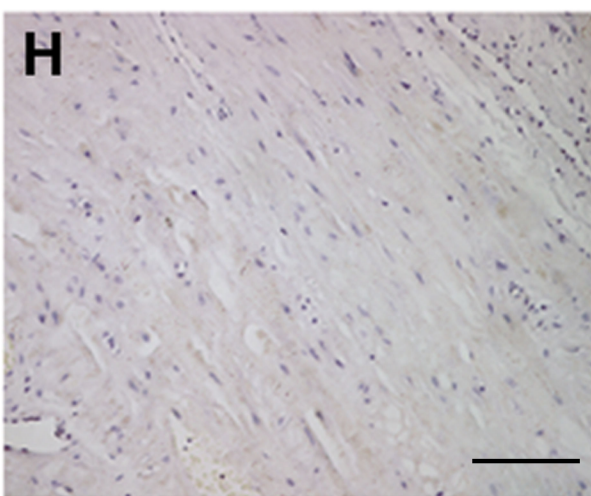

Figure 1

Supplement: MOESM1 [file 9568158]
